# Supplementary material
Source: publisher site journal article supplement (https://www.dovepress.com/article/370957)
Supplement: Supplementary file 1 [file get_supplementary_file.php]

A

ND\_IH+SH vs. ND\_NM

log2FoldChange

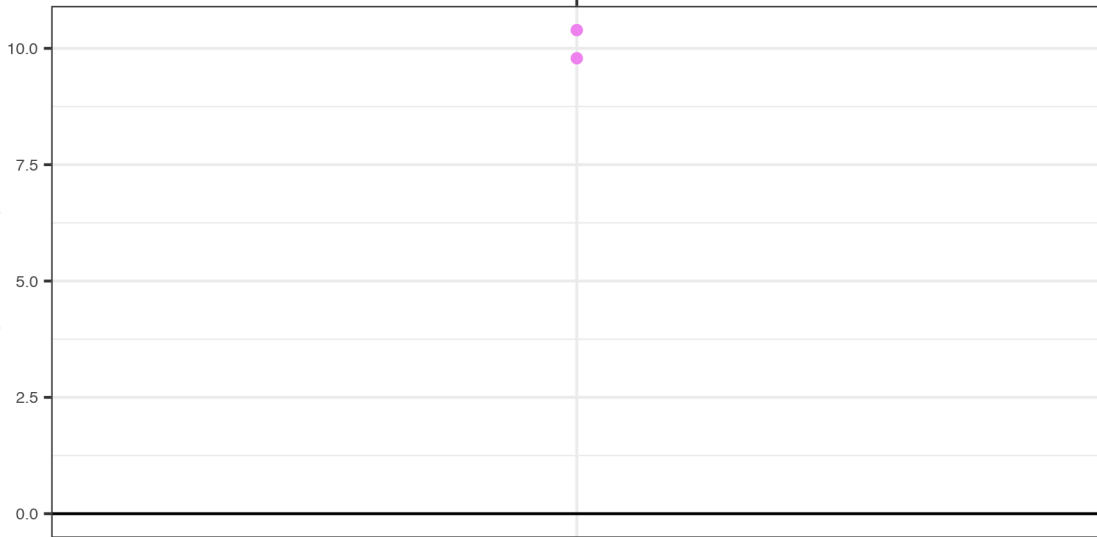

Family ● Muribaculaceae

B

Color Key  
and Histogram

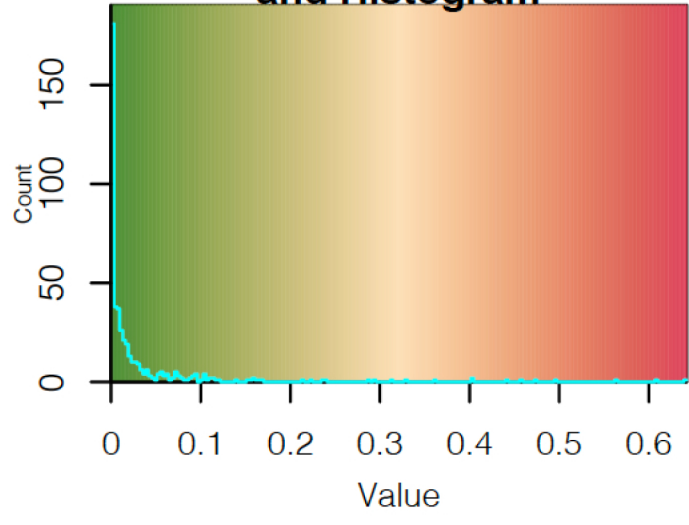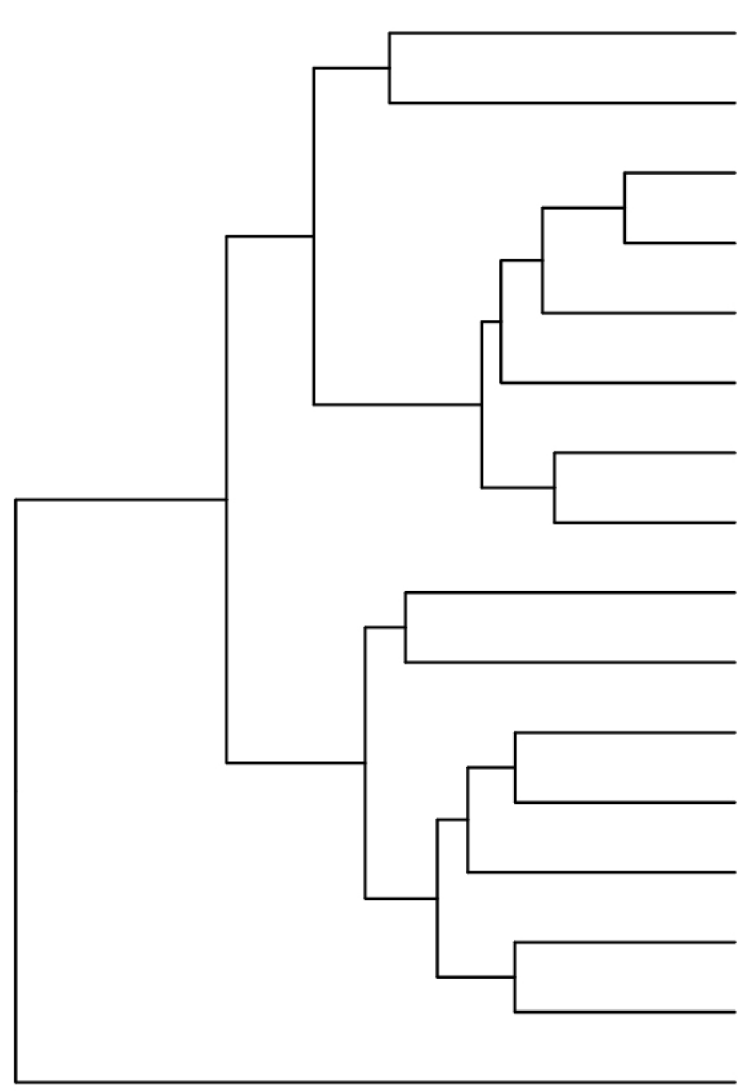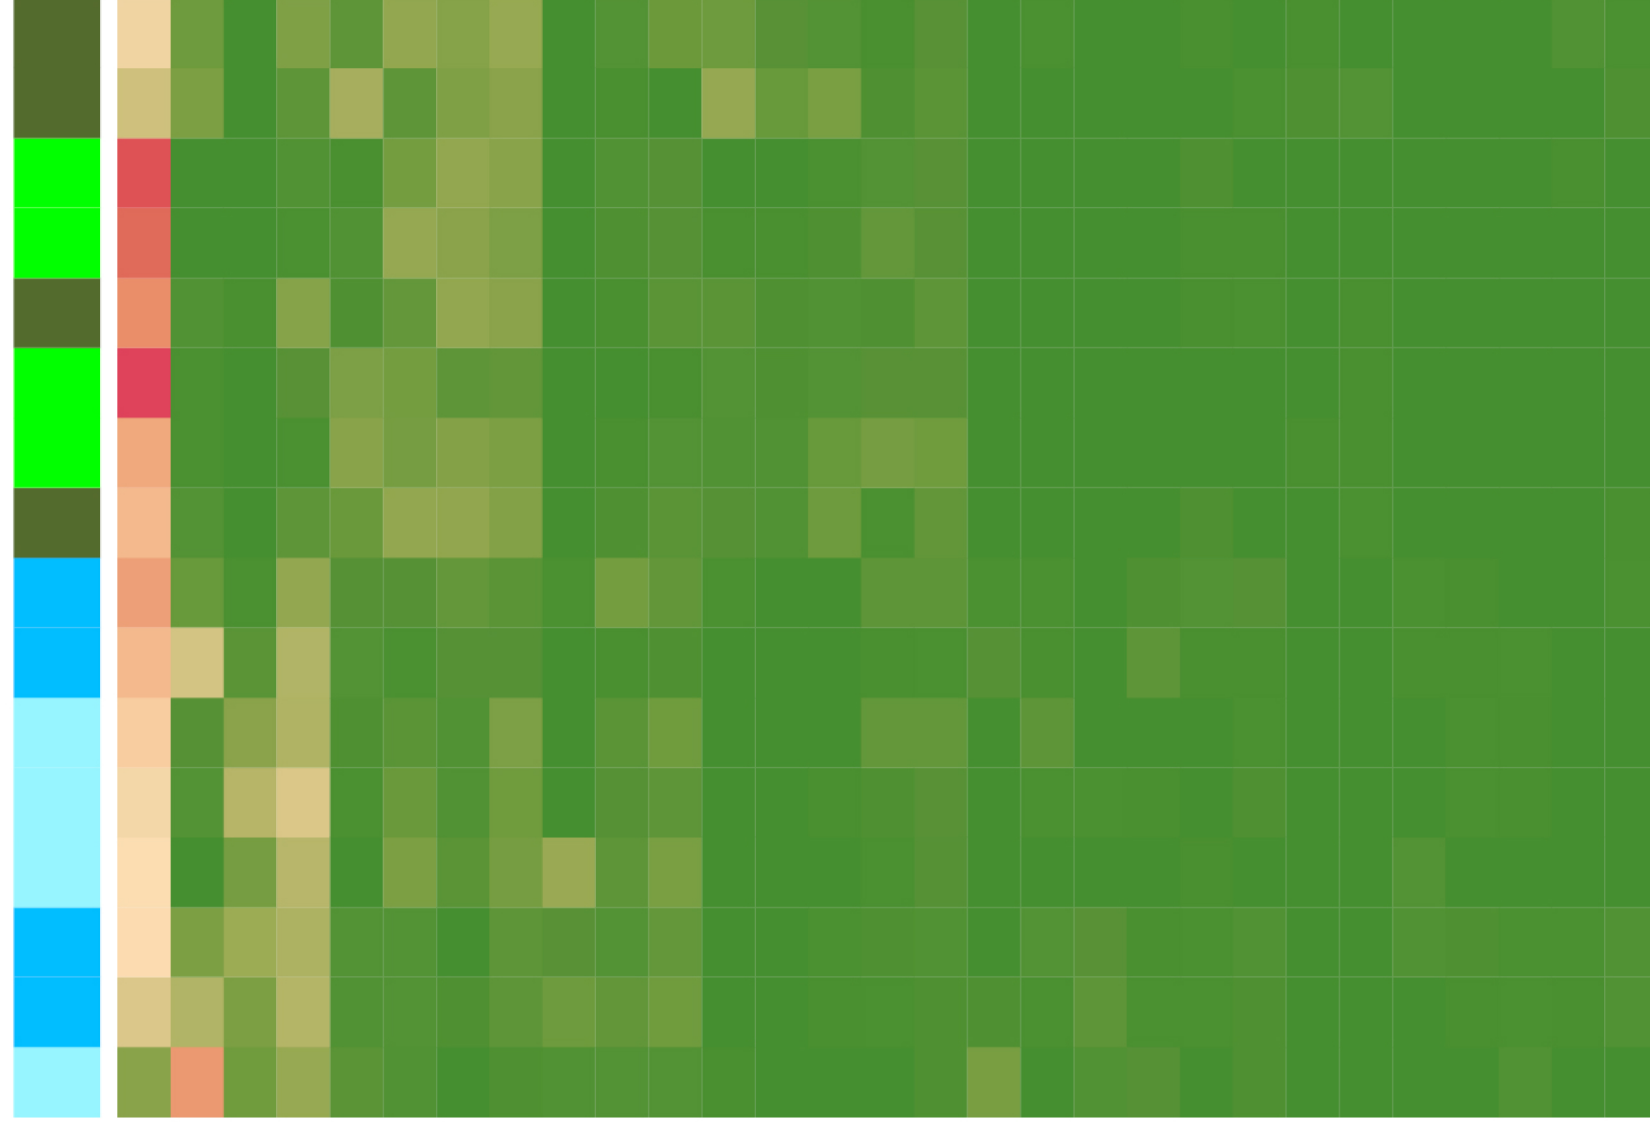

Lachnospiraceae\_NK4A136\_group  
 Dubosiella  
 Anaeroplasma  
 Alistipes  
 Lactobacillus  
 Ruminiclostridium\_9  
 Acetatifactor  
 Ruminiclostridium  
 Lachnospiraceae\_UCG-001  
 Intestinimonas  
 Oscillibacter  
 Romboutsia  
 Lactococcus  
 GCA-900066575  
 A2  
 Lachnoclostridium  
 Bifidobacterium  
 Roseburia  
 Ruminococcaceae\_UCG-014  
 Akkermansia  
 ASF356  
 Ruminiclostridium\_5  
 Lachnospiraceae\_UCG-006  
 Erysipelatoclostridium  
 Eisenbergiella  
 Ruminococcaceae\_UCG-009  
 Turicibacter  
 Pseudoflavonifractor  
 Clostridium\_sensu\_stricto\_1

ejm.012 - HFD\_NM  
 ejm.011 - HFD\_NM  
 ejm.024 - HFD\_IH+SH  
 ejm.021 - HFD\_IH+SH  
 ejm.009 - HFD\_NM  
 ejm.022 - HFD\_IH+SH  
 ejm.023 - HFD\_IH+SH  
 ejm.010 - HFD\_NM  
 ejm.048 - ND\_NM  
 ejm.047 - ND\_NM  
 ejm.035 - ND\_IH+SH  
 ejm.033 - ND\_IH+SH  
 ejm.036 - ND\_IH+SH  
 ejm.046 - ND\_NM  
 ejm.045 - ND\_NM  
 ejm.034 - ND\_IH+SH

C

| Phylum_Class_Order_Family_Genus_Species                                              | HFD_IH v:      |
|--------------------------------------------------------------------------------------|----------------|
|                                                                                      | log2FoldChange |
| Firmicutes_Bacilli_Lactobacillales_Streptococcaceae_Lactococcus_NA                   | 4.84           |
| Firmicutes_Clostridia_Clostridiales_Clostridiales_vadinBB60_group_NA_NA              | -6.69          |
| Firmicutes_Clostridia_Clostridiales_Clostridiales_vadinBB60_group_NA_NA              | -7.83          |
| Firmicutes_Clostridia_Clostridiales_Lachnospiraceae_Lachnospiraceae_NK4A136_group_NA | 11.56          |
| Firmicutes_Clostridia_Clostridiales_Lachnospiraceae_Lachnospiraceae_NK4A136_group_NA | -6.21          |
| Firmicutes_Erysipelotrichia_Erysipelotrichales_Erysipelotrichaceae_Turcibacter_NA    | -7.75          |
| Firmicutes_Clostridia_Clostridiales_Lachnospiraceae_Lachnospiraceae_NK4A136_group_NA | -7.70          |
| Firmicutes_Clostridia_Clostridiales_Lachnospiraceae_Eisenbergiella_NA                | -7.63          |
| Firmicutes_Clostridia_Clostridiales_Lachnospiraceae_Lachnospiraceae_NK4A136_group_NA | -11.97         |
| Firmicutes_Clostridia_Clostridiales_Lachnospiraceae_Lachnospiraceae_NK4A136_group_NA | NA             |
| Firmicutes_Clostridia_Clostridiales_Lachnospiraceae_Lachnospiraceae_NK4A136_group_NA | NA             |
| Firmicutes_Clostridia_Clostridiales_Lachnospiraceae_Lachnospiraceae_NK4A136_group_NA | 7.65           |
| Firmicutes_Clostridia_Clostridiales_Lachnospiraceae_Lachnoclostridium_NA             | NA             |
| Firmicutes_Clostridia_Clostridiales_Lachnospiraceae_Lachnospiraceae_NK4A136_group_NA | NA             |
| Firmicutes_Clostridia_Clostridiales_Lachnospiraceae_A2_NA                            | 5.87           |
| Firmicutes_Clostridia_Clostridiales_Lachnospiraceae_A2_NA                            | -8.18          |
| Firmicutes_Clostridia_Clostridiales_Lachnospiraceae_NA_NA                            | -6.67          |
| Firmicutes_Clostridia_Clostridiales_Lachnospiraceae_A2_NA                            | NA             |
| Firmicutes_Clostridia_Clostridiales_Lachnospiraceae_NA_NA                            | 3.07           |
| Firmicutes_Clostridia_Clostridiales_Lachnospiraceae_A2_NA                            | NA             |
| Firmicutes_Clostridia_Clostridiales_Lachnospiraceae_GCA-900066575_NA                 | NA             |
| Firmicutes_Clostridia_Clostridiales_Ruminococcaceae_Ruminococcaceae_UCG-009_NA       | -4.98          |
| Firmicutes_Clostridia_Clostridiales_Ruminococcaceae_Ruminiclostridium_9_NA           | 1.88           |
| Firmicutes_Clostridia_Clostridiales_Ruminococcaceae_Ruminiclostridium_9_NA           | -2.01          |
| Firmicutes_Clostridia_Clostridiales_Lachnospiraceae_NA_NA                            | NA             |
| Firmicutes_Bacilli_Lactobacillales_Lactobacillaceae_Lactobacillus_NA                 | 5.64           |
| Firmicutes_Clostridia_Clostridiales_Ruminococcaceae_Intestinimonas_NA                | NA             |
| Firmicutes_Clostridia_Clostridiales_Ruminococcaceae_NA_NA                            | NA             |
| Firmicutes_Clostridia_Clostridiales_Ruminococcaceae_NA_NA                            | NA             |
| Firmicutes_Clostridia_Clostridiales_Ruminococcaceae_Oscillibacter_NA                 | -5.74          |

|                                                                                             |        |
|---------------------------------------------------------------------------------------------|--------|
| Firmicutes_Clostridia_Clostridiales_Ruminococcaceae_Oscillibacter_NA                        | 1.58   |
| Firmicutes_Clostridia_Clostridiales_Ruminococcaceae_Ruminiclostridium_NA                    | -9.18  |
| Firmicutes_Clostridia_Clostridiales_Ruminococcaceae_Ruminiclostridium_NA                    | 4.84   |
| Firmicutes_Clostridia_Clostridiales_Ruminococcaceae_Ruminiclostridium_NA                    | 6.73   |
| Firmicutes_Clostridia_Clostridiales_Clostridiales_vadinBB60_group_NA_NA                     | -9.03  |
| Firmicutes_Erysipelotrichia_Erysipelotrichales_Erysipelotrichaceae_Dubosiella_newyorkensis  | -4.80  |
| Firmicutes_Clostridia_Clostridiales_Lachnospiraceae_NA_NA                                   | NA     |
| Tenericutes_Mollicutes_Anaeroplasmatales_Anaeroplasmataceae_Anaeroplasma_NA                 | -6.11  |
| Firmicutes_Clostridia_Clostridiales_Lachnospiraceae_Acetatifactor_NA                        | 4.80   |
| Firmicutes_Clostridia_Clostridiales_Lachnospiraceae_Acetatifactor_NA                        | NA     |
| Tenericutes_Mollicutes_Mollicutes_RF39_NA_NA_NA                                             | -3.23  |
| Bacteroidetes_Bacteroidia_Bacteroidales_Muribaculaceae_NA_NA                                | -12.29 |
| Bacteroidetes_Bacteroidia_Bacteroidales_Muribaculaceae_NA_NA                                | -9.83  |
| Bacteroidetes_Bacteroidia_Bacteroidales_Muribaculaceae_NA_NA                                | 5.45   |
| Bacteroidetes_Bacteroidia_Bacteroidales_Muribaculaceae_NA_NA                                | NA     |
| Bacteroidetes_Bacteroidia_Bacteroidales_Muribaculaceae_NA_NA                                | 5.32   |
| Bacteroidetes_Bacteroidia_Bacteroidales_Muribaculaceae_NA_NA                                | -8.98  |
| Bacteroidetes_Bacteroidia_Bacteroidales_Muribaculaceae_NA_NA                                | -4.43  |
| Firmicutes_Clostridia_Clostridiales_Clostridiales_vadinBB60_group_NA_NA                     | -6.68  |
| Firmicutes_Clostridia_Clostridiales_Clostridiaceae_1_Clostridium_sensu_stricto_1_NA         | -1.05  |
| Bacteroidetes_Bacteroidia_Bacteroidales_Rikenellaceae_Alistipes_NA                          | -4.06  |
| Verrucomicrobia_Verrucomicrobiae_Verrucomicrobiales_Akkermansiaceae_Akkermansia_muciniphila | -8.98  |

| s ND_NM    | HFD_NM vs ND_NM |            | ND_IH vs ND_NM |      | ND_NM vs       |
|------------|-----------------|------------|----------------|------|----------------|
| padj       | log2FoldChange  | padj       | log2FoldChange | padj | log2FoldChange |
| 0.00891556 | 6.38            | 0.00165718 | NA             | NA   | -6.50          |
| 0.00891556 | NA              | NA         | NA             | NA   | 7.14           |
| 0.00446833 | NA              | NA         | NA             | NA   | 8.23           |
| 0.00004358 | NA              | NA         | NA             | NA   | NA             |
| 0.00000133 | -2.80           | 0.00898250 | NA             | NA   | 2.83           |
| 0.00076657 | -8.15           | 0.00071812 | NA             | NA   | 8.04           |
| 0.00162964 | -8.12           | 0.00161799 | NA             | NA   | 8.04           |
| 0.00199744 | -8.05           | 0.00165718 | NA             | NA   | 7.96           |
| 0.00000773 | -12.34          | 0.00000625 | NA             | NA   | 12.09          |
| NA         | NA              | NA         | NA             | NA   | NA             |
| NA         | 6.41            | 0.01886644 | NA             | NA   | NA             |
| 0.00546553 | NA              | NA         | NA             | NA   | NA             |
| NA         | NA              | NA         | NA             | NA   | NA             |
| NA         | NA              | NA         | NA             | NA   | NA             |
| 0.00891556 | NA              | NA         | NA             | NA   | NA             |
| 0.00076657 | -8.58           | 0.00071812 | NA             | NA   | 8.49           |
| 0.00144956 | -7.09           | 0.00125956 | NA             | NA   | 7.00           |
| NA         | NA              | NA         | NA             | NA   | NA             |
| 0.00162964 | 2.54            | 0.00898250 | NA             | NA   | -2.53          |
| NA         | -5.56           | 0.01742801 | NA             | NA   | 5.27           |
| NA         | NA              | NA         | NA             | NA   | NA             |
| 0.00127157 | -6.30           | 0.00031515 | NA             | NA   | 6.27           |
| 0.00446833 | NA              | NA         | NA             | NA   | NA             |
| 0.04460553 | NA              | NA         | NA             | NA   | NA             |
| NA         | NA              | NA         | NA             | NA   | NA             |
| 0.01210229 | NA              | NA         | NA             | NA   | NA             |
| NA         | -2.42           | 0.03794028 | NA             | NA   | 2.45           |
| NA         | NA              | NA         | NA             | NA   | NA             |
| NA         | NA              | NA         | NA             | NA   | NA             |
| 0.00006935 | -10.60          | 0.00000028 | NA             | NA   | 10.24          |

|            |       |            |       |            |       |
|------------|-------|------------|-------|------------|-------|
| 0.02587644 | 4.33  | 0.03043592 | NA    | NA         | -4.62 |
| 0.00000351 | -9.55 | 0.00000227 | NA    | NA         | 9.39  |
| 0.00076657 | 4.50  | 0.00165718 | NA    | NA         | -4.53 |
| 0.00002255 | 5.57  | 0.00064711 | NA    | NA         | -5.73 |
| 0.00090323 | -9.44 | 0.00091363 | NA    | NA         | 9.31  |
| 0.00106616 | NA    | NA         | NA    | NA         | NA    |
| NA         | NA    | NA         | NA    | NA         | NA    |
| 0.00011283 | -6.06 | 0.00021398 | NA    | NA         | 6.07  |
| 0.00446833 | 5.65  | 0.00165718 | NA    | NA         | -5.75 |
| NA         | -2.31 | 0.04580906 | NA    | NA         | 2.32  |
| 0.00973894 | NA    | NA         | NA    | NA         | NA    |
| 0.00000112 | -5.23 | 0.00196375 | NA    | NA         | 5.35  |
| 0.00000000 | -8.20 | 0.00000003 | NA    | NA         | 8.22  |
| 0.00919035 | NA    | NA         | 10.39 | 0.00018012 | NA    |
| NA         | NA    | NA         | NA    | NA         | NA    |
| 0.00763808 | NA    | NA         | 9.79  | 0.00018012 | NA    |
| 0.00026885 | -3.60 | 0.01721137 | NA    | NA         | 3.76  |
| 0.00003618 | NA    | NA         | NA    | NA         | NA    |
| 0.00891556 | NA    | NA         | NA    | NA         | 7.19  |
| 0.00407539 | NA    | NA         | NA    | NA         | NA    |
| 0.00000051 | -2.63 | 0.00091363 | NA    | NA         | 2.64  |
| 0.00016976 | -9.37 | 0.00020499 | NA    | NA         | 9.23  |

| HFD_NM     | HFD_IH vs HFD_NM |            | ND_IH vs HFD_NM |            |
|------------|------------------|------------|-----------------|------------|
| padj       | log2FoldChange   | padj       | log2FoldChange  | padj       |
| 0.00165713 | NA               | NA         | -4.72           | 0.00599014 |
| 0.00898272 | NA               | NA         | NA              | NA         |
| 0.00431965 | NA               | NA         | NA              | NA         |
| NA         | 6.50             | 0.00804640 | NA              | NA         |
| 0.00898272 | NA               | NA         | 3.08            | 0.00599014 |
| 0.00071810 | NA               | NA         | 8.23            | 0.00053193 |
| 0.00161793 | NA               | NA         | 6.26            | 0.01013989 |
| 0.00165713 | NA               | NA         | 7.05            | 0.00599014 |
| 0.00000625 | NA               | NA         | 12.15           | 0.00000470 |
| NA         | NA               | NA         | -8.75           | 0.00053193 |
| NA         | NA               | NA         | NA              | NA         |
| NA         | NA               | NA         | NA              | NA         |
| NA         | NA               | NA         | 5.37            | 0.02655271 |
| NA         | 7.36             | 0.03126161 | NA              | NA         |
| NA         | 8.17             | 0.00426303 | NA              | NA         |
| 0.00071810 | NA               | NA         | 6.54            | 0.00599014 |
| 0.00125954 | NA               | NA         | 7.30            | 0.00080258 |
| NA         | 5.93             | 0.04912345 | NA              | NA         |
| 0.00898272 | NA               | NA         | -5.19           | 0.00002397 |
| 0.01742816 | NA               | NA         | 4.60            | 0.02863824 |
| NA         | NA               | NA         | -2.24           | 0.02289942 |
| 0.00031514 | NA               | NA         | 5.54            | 0.00107063 |
| NA         | NA               | NA         | NA              | NA         |
| NA         | NA               | NA         | NA              | NA         |
| NA         | NA               | NA         | -5.24           | 0.00784891 |
| NA         | NA               | NA         | NA              | NA         |
| 0.03793957 | NA               | NA         | NA              | NA         |
| NA         | NA               | NA         | 1.04            | 0.03892775 |
| NA         | NA               | NA         | -8.44           | 0.00055347 |
| 0.00000028 | NA               | NA         | 10.72           | 0.00000007 |

|            |       |            |       |            |
|------------|-------|------------|-------|------------|
| 0.03043589 | NA    | NA         | NA    | NA         |
| 0.00000227 | NA    | NA         | 10.09 | 0.00000024 |
| 0.00165713 | NA    | NA         | NA    | NA         |
| 0.00064712 | NA    | NA         | NA    | NA         |
| 0.00091361 | NA    | NA         | 7.77  | 0.00492065 |
| NA         | NA    | NA         | 2.51  | 0.03887604 |
| NA         | NA    | NA         | 3.12  | 0.02655124 |
| 0.00021398 | NA    | NA         | 6.66  | 0.00003999 |
| 0.00165713 | NA    | NA         | -4.17 | 0.00599014 |
| 0.04580753 | NA    | NA         | NA    | NA         |
| NA         | NA    | NA         | 2.32  | 0.03892775 |
| 0.00196361 | NA    | NA         | 4.69  | 0.00599014 |
| 0.00000003 | NA    | NA         | 8.44  | 0.00000001 |
| NA         | 7.77  | 0.00426303 | 12.31 | 0.00000028 |
| NA         | 7.19  | 0.03227305 | NA    | NA         |
| NA         | 7.58  | 0.00426303 | 11.72 | 0.00000011 |
| 0.01721045 | NA    | NA         | NA    | NA         |
| NA         | -2.60 | 0.02441552 | NA    | NA         |
| 0.00898272 | NA    | NA         | NA    | NA         |
| NA         | NA    | NA         | NA    | NA         |
| 0.00091361 | NA    | NA         | 2.78  | 0.00053193 |
| 0.00020498 | NA    | NA         | 8.66  | 0.00041788 |



Row.names

CCGAGCGTTGTCGGATTTATTGGGCGTAAAGCGAGCGCAGGTGGTTTATTAAGTCTGGTGTAAAAGGCAGTGGC  
GCAAGCGTTATCCGGAATGACTGGGCGTAAAGGGTGCCTAGGTGGTTTGACAAGTTGGTAGCGTAACTCCGGGG  
GCAAGCGTTATCCGGAATGACTGGGCGTAAAGGGTGCCTAGGTGGTTTGCAAGTTAGTAGCGTAACTCCGGGG  
GCAAGCGTTATCCGGAATTACTGGGTGTAAAGGGAGCGTAGACGGTAATGTAAGTCTGGAGTGAAAGGCCGGGG  
GCAAGCGTTATCCGGAATTACTGGGTGTAAAGGGAGCGTAGACGGTGATGCAAGTCTGGAGTGAAAGGCCGGGG  
GCAAGCGTTATCCGGAATTATTGGGCGTAAAGAGCGCGCAGGTGGTTAATTAAGTCTGATGTGAAAGCCCACGGC  
GCAAGCGTTATCCGGATTTACTGGGTGTAAAGGGAGCGTAGACGGCAAGACAAGCCTGGAGTGAAAGGCCGGGG  
GCAAGCGTTATCCGGATTTACTGGGTGTAAAGGGAGCGTAGACGGCAATGCAAGCCAGATGTGAAAACCCGCGAG  
GCAAGCGTTATCCGGATTTACTGGGTGTAAAGGGAGCGTAGACGGCAGCACAAAGTCTGGAGTGAAATCCCAGGG  
GCAAGCGTTATCCGGATTTACTGGGTGTAAAGGGAGCGTAGACGGCAGCGCAAGTCTGGAGTGAAATGCCGGGG  
GCAAGCGTTATCCGGATTTACTGGGTGTAAAGGGAGCGTAGACGGCAGGGCAAGTCTGGAGTGAAAGGCAGGG  
GCAAGCGTTATCCGGATTTACTGGGTGTAAAGGGAGCGTAGACGGCGATGCAAGTCTGAAGTGAAAGGCCGGGG  
GCAAGCGTTATCCGGATTTACTGGGTGTAAAGGGAGCGTAGACGGCTGCGCAAGTCTGAAGTGAAAGCCCAGGG  
GCAAGCGTTATCCGGATTTACTGGGTGTAAAGGGAGCGTAGACGGTAGTGCAAGTCTGGAGTGAAAGGCCGGGG  
GCAAGCGTTATCCGGATTTACTGGGTGTAAAGGGAGCGTAGACGGCCTGCCAAGTCTGATGTGAAATACCGGGG  
GCAAGCGTTATCCGGATTTACTGGGTGTAAAGGGAGCGTAGGCGGCCTGGCAAGCCTGATGTGAAATACCGGGG  
GCAAGCGTTATCCGGATTTACTGGGTGTAAAGGGAGCGTAGGCGGCCTGGCAAGTCTGGTGTGAAAACCCAGGG  
GCAAGCGTTATCCGGATTTACTGGGTGTAAAGGGAGCGTAGGCGGCCTGTCAAGTCTGATGTGAAATACCGGGG  
GCAAGCGTTATCCGGATTTACTGGGTGTAAAGGGAGCGTAGGCGGCCTAAGTCTGATGTGAAAACCCAGGG  
GCAAGCGTTATCCGGATTTACTGGGTGTAAAGGGAGCGTAGGCGGCGGTTAAGTCTGATGTGAAAACCCAGGG  
GCAAGCGTTATCCGGATTTACTGGGTGTAAAGGGAGCGTAGGCGGCGGGGCAAGCCTGATGTGAAAGCCCAGGG  
GCAAGCGTTATCCGGATTTACTGGGTGTAAAGGGAGCGTAGGCGGTTAGCAAGTCAGAAGTGAAAGCCCAGGG  
GCAAGCGTTATCCGGATTTACTGGGTGTAAAGGGCGAGTAGGCGGGATTGCAAGTCAGATGTGAAAACATGGG  
GCAAGCGTTATCCGGATTTACTGGGTGTAAAGGGCGTGTAGGCGGGACTGCAAGTCAGATGTGAAAACACGGG  
GCAAGCGTTATCCGGATTTACTGGGTGTAAAGGGCGTGTAGGCGGGAGAGCAAGTCAGACGTGAAATCCAGGG  
GCAAGCGTTATCCGGATTTACTGGGTGTAAAGGGGCGCAGACGGCGATGCAAGCCAGGAGTGAAAGCCCAGGG  
GCAAGCGTTATCCGGATTTATTGGGCGTAAAGGGAACGCAGGCGGTCTTTAAGTCTGATGTGAAAGCCTTCGGC  
GCAAGCGTTATCCGGATTTATTGGGTGTAAAGGGCGTGTAGGCGGGAATGCAAGTCAGATGTGAAAACATGGG  
GCAAGCGTTATCCGGATTTATTGGGTGTAAAGGGCGTGTAGGCGGGAATGCAAGTCAGATGTGAAAACACGGG  
GCAAGCGTTATCCGGATTTATTGGGTGTAAAGGGCGTGTAGGCGGGAGCGCAAGTCAGATGTGAAAACACGGG  
GCAAGCGTTGTCGGATTTACTGGGTGTAAAGGGCGTGCAGCCGGAGAGACAAGTCAGATGTGAAATCCACGGG  
GCAAGCGTTGTCGGATTTACTGGGTGTAAAGGGCGTGCAGCCGGAGAGACAAGTCAGATGTGAAATCCACGGG  
GCAAGCGTTGTCGGATTTACTGGGTGTAAAGGGCGTGCAGCCGGTTTATAAGTCAGATGTGAAATCCCAGGG  
GCAAGCGTTGTCGGATTTACTGGGTGTAAAGGGCGTGTAGCCGGCCGGCAAGTCAGATGTGAAATCCCAAGG  
GCAAGCGTTGTCGGATTTACTGGGTGTAAAGGGCGTGTAGCCGGTTGACAAGTCAGATGTGAAATCCTGCGG  
GCAAGCGTTGTTCCGGAATGACTGGGCGTAAAGGGTGCCTAGGCGGTTGTACAAGTTAGAAGTGAAATACCCAGG  
GCGAGCGTTATCCGGAATGATTGGGCGTAAAGGGTGCCTAGGCGGCGCCGGGCAAGTCCGCAGTAAAACTGGAG  
GCGAGCGTTATCCGGAATTACTGGGTGTAAAGGGAGCGTAGACGGCGAGGTAAGCCTGAAGTGGAAGCCCAGG  
GCGAGCGTTATCCGGAATTATTGGGCGTAAAGGGTGCCTAGATGGCATAGTAAGTCTTTTGTAAAAATGCTGGG  
GCGAGCGTTATCCGGATTTACTGGGTGTAAAGGGAGCGTAGACGGCCAAGCAAGCCAGGGGTGAAAGCCCAGGG  
GCGAGCGTTATCCGGATTTACTGGGTGTAAAGGGAGCGTAGACGGCCGTGCAAGCCAGGAGTGAAAGCCCAGGG  
GCGAGCGTTATCCGGATTTATTGGGCGTAAAGCGTCCGCAGCCGGTTTATTAAGTATAGAATAAACTTCGGGGC  
GCGAGCGTTATCCGGATTTATTGGGTTTAAAGGGTGCCTAGGCGGACTGTCAAGTCAGCGGTAAAATTGAGAGG



| HFD_IH_vs_I | HFD_IH_vs_I | HFD_NM_vs_I | HFD_NM_vs_I | ND_IH_vs_I | NIND_IH_vs_I | NIND_NM_vs_I |
|-------------|-------------|-------------|-------------|------------|--------------|--------------|
| 4.8367052   | 0.00891556  | 6.38093592  | 0.00165718  | NA         | NA           | -6.4968508   |
| -6.6915638  | 0.00891556  | NA          | NA          | NA         | NA           | 7.14259467   |
| -7.8306593  | 0.00446833  | NA          | NA          | NA         | NA           | 8.22734035   |
| 11.5632754  | 4.36E-05    | NA          | NA          | NA         | NA           | NA           |
| -6.2122222  | 1.33E-06    | -2.8038391  | 0.0089825   | NA         | NA           | 2.8287503    |
| -7.7458296  | 0.00076657  | -8.1539879  | 0.00071812  | NA         | NA           | 8.03874409   |
| -7.6996192  | 0.00162964  | -8.1215331  | 0.00161799  | NA         | NA           | 8.03650865   |
| -7.6282193  | 0.00199744  | -8.0528393  | 0.00165718  | NA         | NA           | 7.95686279   |
| -11.969931  | 7.73E-06    | -12.337919  | 6.25E-06    | NA         | NA           | 12.0889534   |
| NA          | NA          | NA          | NA          | NA         | NA           | NA           |
| NA          | NA          | 6.40865245  | 0.01886644  | NA         | NA           | NA           |
| 7.65231457  | 0.00546553  | NA          | NA          | NA         | NA           | NA           |
| NA          | NA          | NA          | NA          | NA         | NA           | NA           |
| NA          | NA          | NA          | NA          | NA         | NA           | NA           |
| 5.87482541  | 0.00891556  | NA          | NA          | NA         | NA           | NA           |
| -8.1775355  | 0.00076657  | -8.5829632  | 0.00071812  | NA         | NA           | 8.4897534    |
| -6.6662763  | 0.00144956  | -7.0882381  | 0.00125956  | NA         | NA           | 7.00392823   |
| NA          | NA          | NA          | NA          | NA         | NA           | NA           |
| 3.07406302  | 0.00162964  | 2.54074119  | 0.0089825   | NA         | NA           | -2.5256038   |
| NA          | NA          | -5.5626944  | 0.01742801  | NA         | NA           | 5.27410205   |
| NA          | NA          | NA          | NA          | NA         | NA           | NA           |
| -4.9782938  | 0.00127157  | -6.3045001  | 0.00031515  | NA         | NA           | 6.2726804    |
| 1.87967127  | 0.00446833  | NA          | NA          | NA         | NA           | NA           |
| -2.0075268  | 0.04460553  | NA          | NA          | NA         | NA           | NA           |
| NA          | NA          | NA          | NA          | NA         | NA           | NA           |
| 5.6424045   | 0.01210229  | NA          | NA          | NA         | NA           | NA           |
| NA          | NA          | -2.4213586  | 0.03794028  | NA         | NA           | 2.45108624   |
| NA          | NA          | NA          | NA          | NA         | NA           | NA           |
| NA          | NA          | NA          | NA          | NA         | NA           | NA           |
| -5.735928   | 6.94E-05    | -10.59919   | 2.78E-07    | NA         | NA           | 10.2441154   |
| 1.57953809  | 0.02587644  | 4.33174305  | 0.03043592  | NA         | NA           | -4.6243184   |
| -9.1771061  | 3.51E-06    | -9.5547761  | 2.27E-06    | NA         | NA           | 9.39126396   |
| 4.83546766  | 0.00076657  | 4.49641485  | 0.00165718  | NA         | NA           | -4.5331543   |
| 6.72713465  | 2.26E-05    | 5.56550557  | 0.00064711  | NA         | NA           | -5.7277433   |
| -9.0334953  | 0.00090323  | -9.4380495  | 0.00091363  | NA         | NA           | 9.30734613   |
| -4.7972235  | 0.00106616  | NA          | NA          | NA         | NA           | NA           |
| NA          | NA          | NA          | NA          | NA         | NA           | NA           |
| -6.1067512  | 0.00011283  | -6.0619215  | 0.00021398  | NA         | NA           | 6.06894912   |
| 4.79525473  | 0.00446833  | 5.65403021  | 0.00165718  | NA         | NA           | -5.7519947   |
| NA          | NA          | -2.3131606  | 0.04580906  | NA         | NA           | 2.31977695   |
| -3.2270901  | 0.00973894  | NA          | NA          | NA         | NA           | NA           |
| -12.285624  | 1.12E-06    | -5.2308722  | 0.00196375  | NA         | NA           | 5.34601982   |

|            |            |            |            |            |            |            |
|------------|------------|------------|------------|------------|------------|------------|
| -9.83394   | 8.88E-10   | -8.1996191 | 3.02E-08   | NA         | NA         | 8.21788795 |
| 5.44652648 | 0.00919035 | NA         | NA         | 10.3921008 | 0.00018012 | NA         |
| NA         |
| 5.32456204 | 0.00763808 | NA         | NA         | 9.78670971 | 0.00018012 | NA         |
| -8.9760842 | 0.00026885 | -3.5989725 | 0.01721137 | NA         | NA         | 3.75717801 |
| -4.4310062 | 3.62E-05   | NA         | NA         | NA         | NA         | NA         |
| -6.6764367 | 0.00891556 | NA         | NA         | NA         | NA         | 7.18607637 |
| -1.0460644 | 0.00407539 | NA         | NA         | NA         | NA         | NA         |
| -4.0624955 | 5.07E-07   | -2.6321351 | 0.00091363 | NA         | NA         | 2.63988423 |
| -8.9824467 | 0.00016976 | -9.3728948 | 0.00020499 | NA         | NA         | 9.23431765 |

| ND_NM_vs_I | HFD_IH_vs_F | HFD_IH_vs_F | ND_IH_vs_HI | ND_IH_vs_HI | Kingdom  | Phylum        |
|------------|-------------|-------------|-------------|-------------|----------|---------------|
| 0.00165713 | NA          | NA          | -4.7186277  | 0.00599014  | Bacteria | Firmicutes    |
| 0.00898272 | NA          | NA          | NA          | NA          | Bacteria | Firmicutes    |
| 0.00431965 | NA          | NA          | NA          | NA          | Bacteria | Firmicutes    |
| NA         | 6.50014625  | 0.0080464   | NA          | NA          | Bacteria | Firmicutes    |
| 0.00898272 | NA          | NA          | 3.0802569   | 0.00599014  | Bacteria | Firmicutes    |
| 0.0007181  | NA          | NA          | 8.22502124  | 0.00053193  | Bacteria | Firmicutes    |
| 0.00161793 | NA          | NA          | 6.26289494  | 0.01013989  | Bacteria | Firmicutes    |
| 0.00165713 | NA          | NA          | 7.04802426  | 0.00599014  | Bacteria | Firmicutes    |
| 6.25E-06   | NA          | NA          | 12.1547773  | 4.70E-06    | Bacteria | Firmicutes    |
| NA         | NA          | NA          | -8.7515595  | 0.00053193  | Bacteria | Firmicutes    |
| NA         | NA          | NA          | NA          | NA          | Bacteria | Firmicutes    |
| NA         | NA          | NA          | NA          | NA          | Bacteria | Firmicutes    |
| NA         | NA          | NA          | 5.36906532  | 0.02655271  | Bacteria | Firmicutes    |
| NA         | 7.36270882  | 0.03126161  | NA          | NA          | Bacteria | Firmicutes    |
| NA         | 8.17376681  | 0.00426303  | NA          | NA          | Bacteria | Firmicutes    |
| 0.0007181  | NA          | NA          | 6.54049842  | 0.00599014  | Bacteria | Firmicutes    |
| 0.00125954 | NA          | NA          | 7.3038088   | 0.00080258  | Bacteria | Firmicutes    |
| NA         | 5.92958643  | 0.04912345  | NA          | NA          | Bacteria | Firmicutes    |
| 0.00898272 | NA          | NA          | -5.1865246  | 2.40E-05    | Bacteria | Firmicutes    |
| 0.01742816 | NA          | NA          | 4.59945997  | 0.02863824  | Bacteria | Firmicutes    |
| NA         | NA          | NA          | -2.2409721  | 0.02289942  | Bacteria | Firmicutes    |
| 0.00031514 | NA          | NA          | 5.53868344  | 0.00107063  | Bacteria | Firmicutes    |
| NA         | NA          | NA          | NA          | NA          | Bacteria | Firmicutes    |
| NA         | NA          | NA          | NA          | NA          | Bacteria | Firmicutes    |
| NA         | NA          | NA          | -5.237536   | 0.00784891  | Bacteria | Firmicutes    |
| NA         | NA          | NA          | NA          | NA          | Bacteria | Firmicutes    |
| 0.03793957 | NA          | NA          | NA          | NA          | Bacteria | Firmicutes    |
| NA         | NA          | NA          | 1.04437894  | 0.03892775  | Bacteria | Firmicutes    |
| NA         | NA          | NA          | -8.4435837  | 0.00055347  | Bacteria | Firmicutes    |
| 2.78E-07   | NA          | NA          | 10.7210738  | 7.02E-08    | Bacteria | Firmicutes    |
| 0.03043589 | NA          | NA          | NA          | NA          | Bacteria | Firmicutes    |
| 2.27E-06   | NA          | NA          | 10.0936283  | 2.44E-07    | Bacteria | Firmicutes    |
| 0.00165713 | NA          | NA          | NA          | NA          | Bacteria | Firmicutes    |
| 0.00064712 | NA          | NA          | NA          | NA          | Bacteria | Firmicutes    |
| 0.00091361 | NA          | NA          | 7.76744988  | 0.00492065  | Bacteria | Firmicutes    |
| NA         | NA          | NA          | 2.50524144  | 0.03887604  | Bacteria | Firmicutes    |
| NA         | NA          | NA          | 3.12478065  | 0.02655124  | Bacteria | Firmicutes    |
| 0.00021398 | NA          | NA          | 6.65940957  | 4.00E-05    | Bacteria | Tenericutes   |
| 0.00165713 | NA          | NA          | -4.166239   | 0.00599014  | Bacteria | Firmicutes    |
| 0.04580753 | NA          | NA          | NA          | NA          | Bacteria | Firmicutes    |
| NA         | NA          | NA          | 2.32327489  | 0.03892775  | Bacteria | Tenericutes   |
| 0.00196361 | NA          | NA          | 4.68574718  | 0.00599014  | Bacteria | Bacteroidete: |

|            |            |            |            |            |          |                 |
|------------|------------|------------|------------|------------|----------|-----------------|
| 3.02E-08   | NA         | NA         | 8.43797142 | 1.37E-08   | Bacteria | Bacteroidete:   |
| NA         | 7.77103377 | 0.00426303 | 12.3121124 | 2.77E-07   | Bacteria | Bacteroidete:   |
| NA         | 7.18576421 | 0.03227305 | NA         | NA         | Bacteria | Bacteroidete:   |
| NA         | 7.57626486 | 0.00426303 | 11.7189326 | 1.08E-07   | Bacteria | Bacteroidete:   |
| 0.01721045 | NA         | NA         | NA         | NA         | Bacteria | Bacteroidete:   |
| NA         | -2.5988459 | 0.02441552 | NA         | NA         | Bacteria | Bacteroidete:   |
| 0.00898272 | NA         | NA         | NA         | NA         | Bacteria | Firmicutes      |
| NA         | NA         | NA         | NA         | NA         | Bacteria | Firmicutes      |
| 0.00091361 | NA         | NA         | 2.77860877 | 0.00053193 | Bacteria | Bacteroidete:   |
| 0.00020498 | NA         | NA         | 8.66256465 | 0.00041788 | Bacteria | Verrucomicrobia |

| Class           | Order           | Family           | Genus          | Species      |
|-----------------|-----------------|------------------|----------------|--------------|
| Bacilli         | Lactobacillales | Streptococcae    | Lactococcus    | NA           |
| Clostridia      | Clostridiales   | Clostridiales_NA |                | NA           |
| Clostridia      | Clostridiales   | Clostridiales_NA |                | NA           |
| Clostridia      | Clostridiales   | Lachnospiraceae  | Lachnospirac   | NA           |
| Clostridia      | Clostridiales   | Lachnospiraceae  | Lachnospirac   | NA           |
| Erysipelotrichi | Erysipelotrichi | Erysipelotrichi  | Turicibacter   | NA           |
| Clostridia      | Clostridiales   | Lachnospiraceae  | Lachnospirac   | NA           |
| Clostridia      | Clostridiales   | Lachnospiraceae  | Eisenbergiella | NA           |
| Clostridia      | Clostridiales   | Lachnospiraceae  | Lachnospirac   | NA           |
| Clostridia      | Clostridiales   | Lachnospiraceae  | Lachnospirac   | NA           |
| Clostridia      | Clostridiales   | Lachnospiraceae  | Lachnospirac   | NA           |
| Clostridia      | Clostridiales   | Lachnospiraceae  | Lachnospirac   | NA           |
| Clostridia      | Clostridiales   | Lachnospiraceae  | Lachnoclostr   | NA           |
| Clostridia      | Clostridiales   | Lachnospiraceae  | Lachnospirac   | NA           |
| Clostridia      | Clostridiales   | Lachnospiraceae  | A2             | NA           |
| Clostridia      | Clostridiales   | Lachnospiraceae  | A2             | NA           |
| Clostridia      | Clostridiales   | Lachnospiraceae  | NA             | NA           |
| Clostridia      | Clostridiales   | Lachnospiraceae  | A2             | NA           |
| Clostridia      | Clostridiales   | Lachnospiraceae  | NA             | NA           |
| Clostridia      | Clostridiales   | Lachnospiraceae  | A2             | NA           |
| Clostridia      | Clostridiales   | Lachnospiraceae  | GCA-900066     | NA           |
| Clostridia      | Clostridiales   | Ruminococcae     | Ruminococca    | NA           |
| Clostridia      | Clostridiales   | Ruminococcae     | Ruminiclostr   | NA           |
| Clostridia      | Clostridiales   | Ruminococcae     | Ruminiclostr   | NA           |
| Clostridia      | Clostridiales   | Lachnospiraceae  | NA             | NA           |
| Bacilli         | Lactobacillales | Lactobacillaceae | Lactobacillus  | NA           |
| Clostridia      | Clostridiales   | Ruminococcae     | Intestinimon   | NA           |
| Clostridia      | Clostridiales   | Ruminococcae     | NA             | NA           |
| Clostridia      | Clostridiales   | Ruminococcae     | NA             | NA           |
| Clostridia      | Clostridiales   | Ruminococcae     | Oscillibacter  | NA           |
| Clostridia      | Clostridiales   | Ruminococcae     | Oscillibacter  | NA           |
| Clostridia      | Clostridiales   | Ruminococcae     | Ruminiclostr   | NA           |
| Clostridia      | Clostridiales   | Ruminococcae     | Ruminiclostr   | NA           |
| Clostridia      | Clostridiales   | Ruminococcae     | Ruminiclostr   | NA           |
| Clostridia      | Clostridiales   | Clostridiales_NA |                | NA           |
| Erysipelotrichi | Erysipelotrichi | Erysipelotrichi  | Dubosiella     | newyorkensis |
| Clostridia      | Clostridiales   | Lachnospiraceae  | NA             | NA           |
| Mollicutes      | Anaeroplasm     | Anaeroplasm      | Anaeroplasm    | NA           |
| Clostridia      | Clostridiales   | Lachnospiraceae  | Acetatifactor  | NA           |
| Clostridia      | Clostridiales   | Lachnospiraceae  | Acetatifactor  | NA           |
| Mollicutes      | Mollicutes_R    | NA               | NA             | NA           |
| Bacteroidia     | Bacteroidales   | Muribaculaceae   | NA             | NA           |

|                 |                 |                |             |             |
|-----------------|-----------------|----------------|-------------|-------------|
| Bacteroidia     | Bacteroidales   | Muribaculaceae | NA          | NA          |
| Bacteroidia     | Bacteroidales   | Muribaculaceae | NA          | NA          |
| Bacteroidia     | Bacteroidales   | Muribaculaceae | NA          | NA          |
| Bacteroidia     | Bacteroidales   | Muribaculaceae | NA          | NA          |
| Bacteroidia     | Bacteroidales   | Muribaculaceae | NA          | NA          |
| Bacteroidia     | Bacteroidales   | Muribaculaceae | NA          | NA          |
| Clostridia      | Clostridiales   | Clostridiales  | _NA         | NA          |
| Clostridia      | Clostridiales   | Clostridiaceae | Clostridium | _NA         |
| Bacteroidia     | Bacteroidales   | Rikenellaceae  | Alistipes   | NA          |
| Verrucomicrobia | Verrucomicrobia | Akkermansia    | Akkermansia | muciniphila |



Supplementary data-A (p 1). Two unclassified genera from the Muribaculaceae family that passed DESeq2 analysis.

Supplementary data-B (p 2). Heatmap (Genus level analysis) confirming that diet was the most significant variable shaping mucosal colonic microbiota.

Supplementary data-C (p 3-16). A summary of the microbial community changes between the experimental groups.
